# Supplementary material for: A somatic mutation in erythro-myeloid progenitors causes neurodegenerative disease
Source: Springer Nature journal article supplement (doi:10.1038/nature23672), 2017-08-29
Supplement: 41586_2017_BFnature23672_MOESM1_ESM.pdf [file 41586_2017_BFnature23672_MOESM1_ESM.pdf]

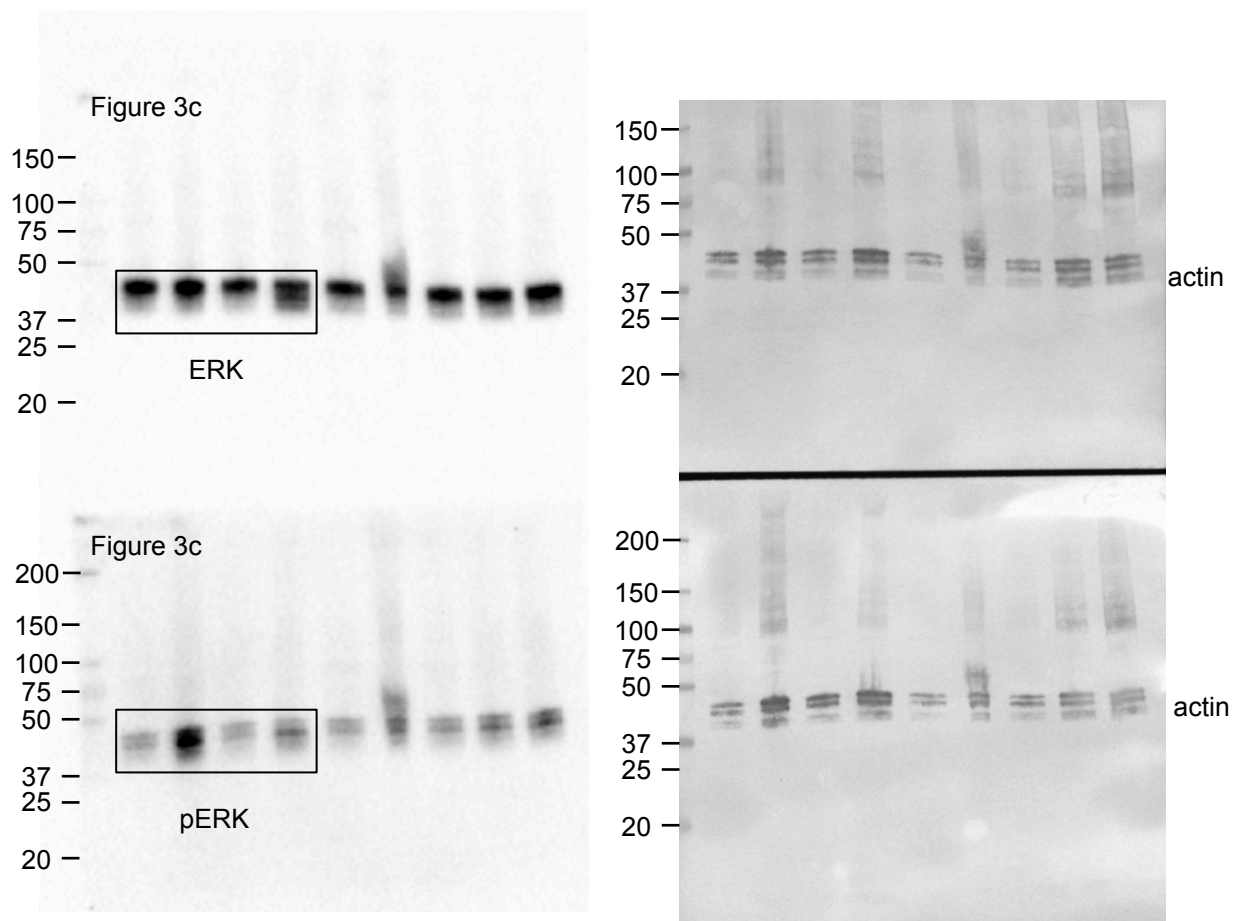

Supplemental Figure 1 Gel source data

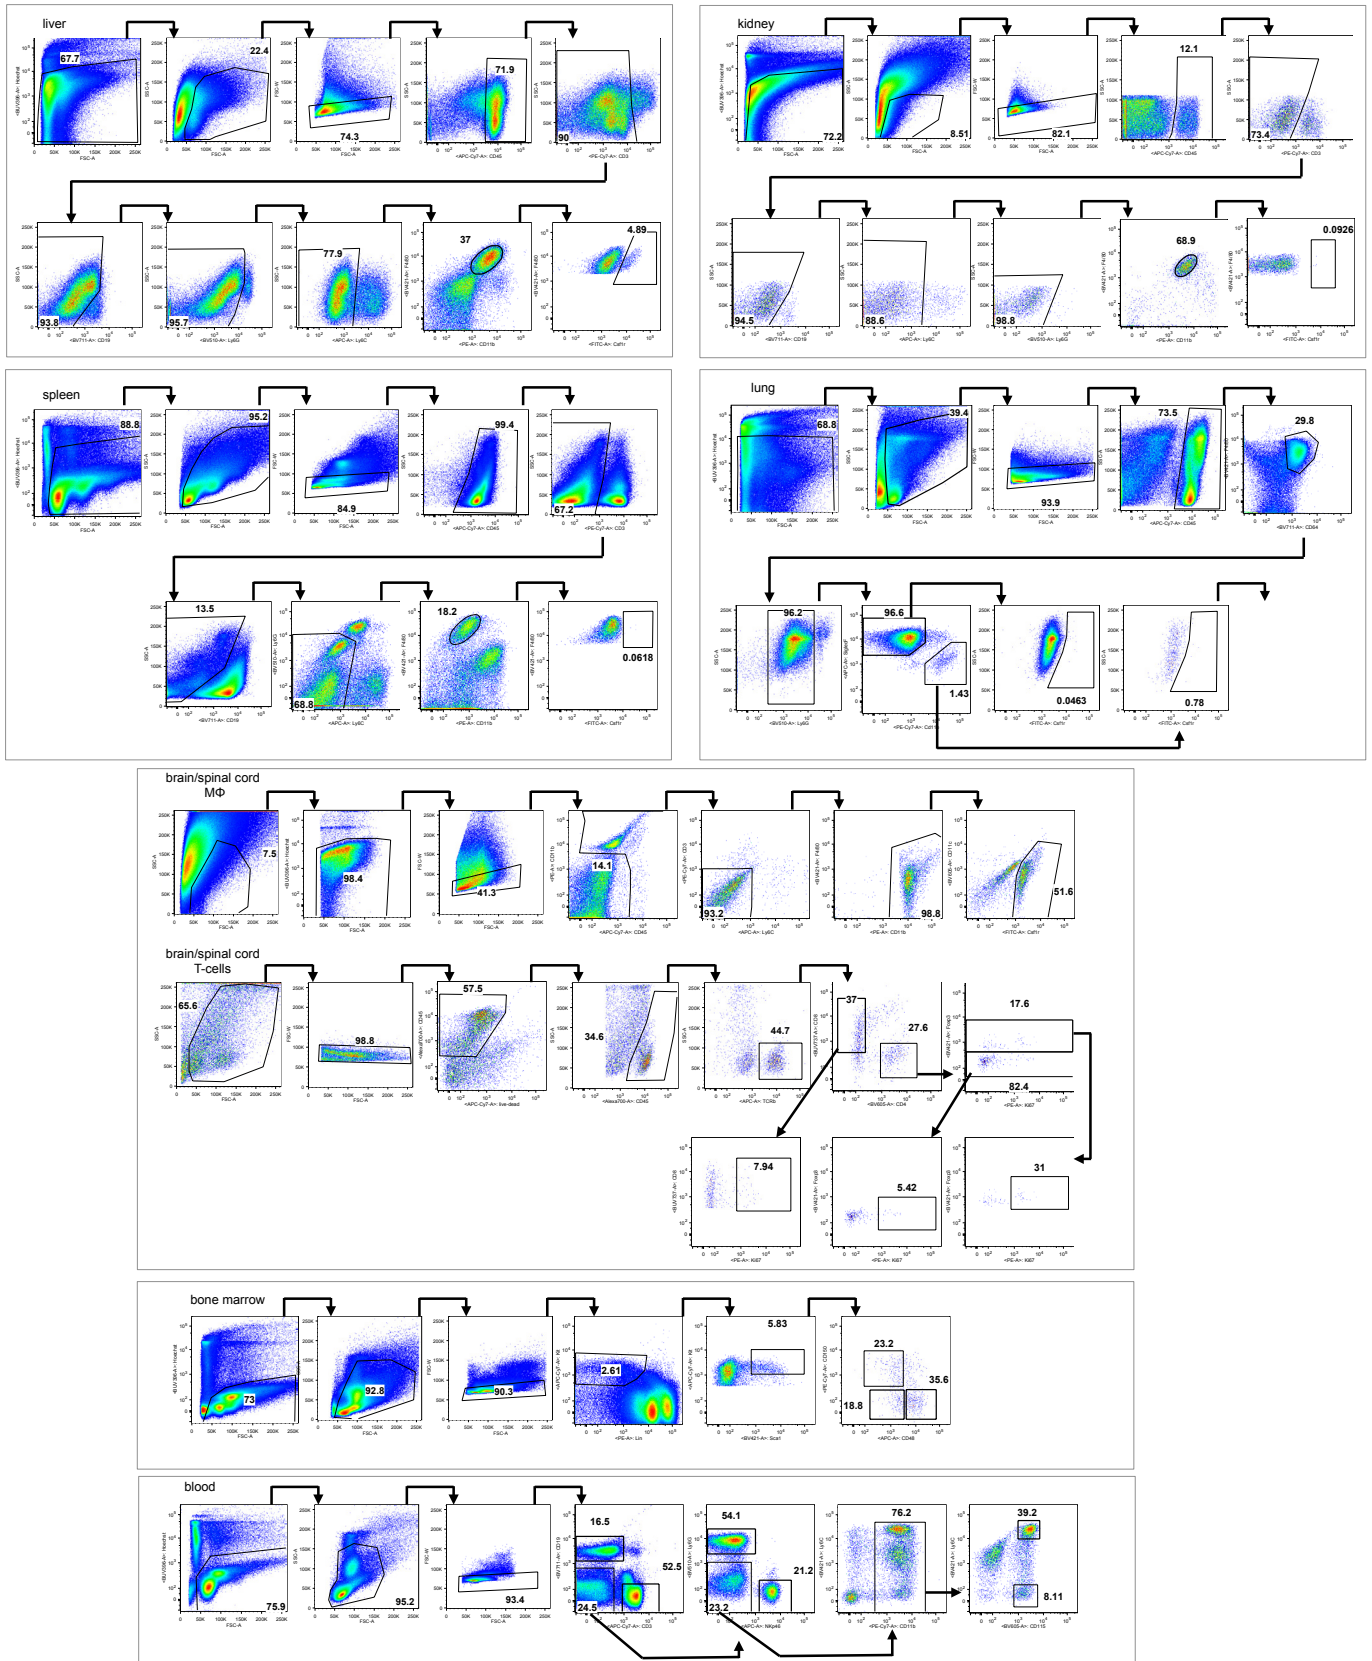

Supplemental Figure 2 Gating strategy for different tissues and cell types.
